# Supplementary material for: Live imaging of the Cryptosporidium parvum life cycle reveals direct development of male and female gametes from type I meronts
Source: PLoS Biol. 2022 Apr 18;20(4):e3001604. doi: 10.1371/journal.pbio.3001604 (PMC9015140; doi:10.1371/journal.pbio.3001604)
Supplement: S5 Data — (XLSX) [file pbio.3001604.s012.xlsx]

## Sheet: 4Nnuclearspread
Rep2	4N pre-meront	4N Pre-male	Rep3	4N pre-meront	4N Pre-male	Rep4	4N pre-meront	4N Pre-male
	9.78	7.03		11	6.53		6.31	6.51
	8.93	6.62		7.49	5.94		11.23	5.08
	9.08	6.15		11.03	4.04		10.3	6.3
	9.49	5.72		8.61	5.9		7.4	4.6
	11.25	6.7		5.18	5.88		9.63	6.51
	9.5	6.87		9.53	7.24		5.58	5.03
	8.96	7.93		9.66	5.85		9.74	4.97
	8.8	5.98		8.44			9.04	4.84
	10.12	5.34		9.26			8.93	5.93
	10.04	5.61		9.71			9.07	4.23
	11.45	5.28		9.47			9.19	4.32
	9.04	5.58		8.55			6.7	6.2
	10.69	4.43		9.99			9.23	5.2
	8.18	7.5		8.76			9.23	6.29
	8.71	6.05		9.99			6.74	4.81
	9	7.78		10.37			8.03	5.13
	8.53	4.32		6.33			8.24	6.43
	8.54	7.43		10.21			7.82	4.93
	7.84	7.79		8.09			6.95	4.63
	9.28	5.87		7.77			11.39	6.29
	5.18	5.67		8.96			9.42	5.64
	10.66	6.16		9.57			9.33	3.66
	10.7	6.18					9.16	5.94
	9.45	5.97					9.12	5.75
	9.12	5.8					8.89	5.55
	9.49	7.47					8.14	6.48
	11.8	6.53					9.95	5.09
	9.66	7.36					8.23	5.73
	9.74	6.86					8.84	7.35
	10.39	6.31					7.45	4.85
	11.63	6.36					10.06	7.5
	9.34	5.06					9.5	5.56
	12	5.54					8.36	7.12
	10.01	5.73					8.43	6.13
	9.3	6.13					8.22	5.61
	10.18	6.12					8.41
	10.5	5.3					7.41
	8.45	4.68					7.49
	12.35	6.67					9.26
	10.46	7.38					7.95
	9.1	5.12					7.83
	9.33	5.7					7.19
	9.74	5.98					7.47
	9.71	6.62					7.35
	9.75	5.2					9.22
	10.3	6					8.15
	10.35						5.81
	9.52						10.14
	11.68						9.02
	12.09						9.66
							9.16
							8.36
							8.19
							8.99
							9.97
							7.86
							9.26
							9.78
							9.59
							9.4
							8.25
							9.1
							8.95
							7.2
							8.4
							7.22
							9.9
							9.61
							9.53
							9.77
							9.68
							9.16
							7.51
							7.91
							7.58
							8.17
							7.62
							6.65
							6.72
							10.2
							9.2
							12.77
							10.14
							10.35
							9.87
							9.78
							6.36
							9.71
							10.05
							11.41
							9.28
							8.64
							7.78
							8.43
							11.67
							9.01

## Sheet: 8Nnuclearspread
Rep2	Area of 8N meront	Area of 8N Pre-male	Rep3	Area of 8N meront	Area of 8N Pre-male	Rep4	Area of 8N meront	Area of 8N Pre-male	Rep9	Area of 8N meront	Area of 8N Pre-male
	12.95	6.02		11.52	7.57		11.57	6.06		9.11	4.59
	10.14	5.22		13.49	7.27		14.43	7.49		9.54	4.04
	10.95	6.6		12.67	6.39		15.08	7.09		13.12	4.77
	11.04	6.15		14.74	7.58		14.81	7.19		10.16	5.15
	8.67	6.94		10.12	6.73		11.35	6.73		13.28	5.73
	11.88	7.73		11.96	6.18		11	8.13		11.6	5.23
	12.42	7.33		12.17	7.91		11.13	7.67		14.54	4.05
	11.29	6.84		13.52	7.55		12.05	6.96		13.11	4.58
	11.5	5.95		12.88			9.31	7.87		14.23	5.99
	12.97	5.13		9.82			12.81	6.67		13.34	5.48
	9.49	6.01		11.91			12.51	7.92		11.15	5.79
	10.7	6.15		12.49			15.03	6.84		12.19	6.64
	9.12	5.62		9.6			13.59	7		11.36	7.68
	10.94	7.54		10.65			13.65	5.4		11.44	5.3
	8.82	5.82		13.53			15.15	5.44		12.53	7.03
	12.1	6.3		11.74			11.07	5.21		9.95	6.97
	8.9	5.44		11.92			12.7	5.44		13.29	6.43
	11.65	6.21		12.66			10.71	8.78		12.27	6.96
	8.47	7.04		12.17			15.87	6.22		9.71	6.09
	12.24	6.53		13.7			12.48	7.69		11.11	6.79
	11.76	5.67		12.46			12	6.43		11.8	6.43
	13.28	7.96		12.08			13.21	5.64		11.79	6.96
	12.15	5.28		12.83			11.88	7.08		11.34	6.09
	10.7	7.73		11.23			14.44	6.89		9.85	6.79
	9.35	7.05		13.71			10.13	6.08		10.58	6.31
	9.92	6.81		12.65			10.84	8.6		9.31	6.39
	10.77	7					10.99	6.77		10.33	7.1
	15.06	6.01					11.57	6.8		11.87	7.47
	12.95	7.7					10.95	7.13		11.44	8.99
	11.75	7.41					10.63	6.41		13.27	5.03
	9.28	6.99					10.62	7.17		9.61	7.04
	15.07	6.2					13.33	8.86		8.72	6.3
	14.5	5.76					11.56	5.65		15.75	6.47
	9.99	7.68					11.08	6.58		11.42	6.45
	12.69	7.57					11.13	7.39		12.34	7
	13.24	7.17					12.57	8.69		12.03	7.2
	10.87	6.21					13.17			12.72	6.15
	13.53	5.8					15.08			10.78	6.39
	11.6	5.91					13.32			13.64	5.66
	12.27	6.79					12.43			11.71	5.8
	13.68	7.62					12.2			10.71	6.62
	12.37	8.15					11.79			12.32	7.53
	14.42	6.05					10.94			11.86	5.68
	13.52	5.93					14.04			12.73	5.7
	13.54	5.92					13.47			11.57	6.29
	14.9	7.49					14.49			10.86	7.25
	10	5.23					13.62			14.68	6.55
	13.13	7.03					13.64			13.34	6.88
	12.34	5.58					16.56			13.44	7.48
	15.22	6.4					11.38			10.94
	11.74	8.91					11.27			11.44
	12.79						14.03			12.56
	11.99						10.33			10.67
	14.05						11.32			11.82
	12.62						14.58			14.24
	13.68						12.85			12.69
	12.13						15.42			11.91
							11.97			13.85
							12.58			14.57
							13.92			13.5
							15.75			13.11
							13.38			10.56
							12.68			10.2
							11.27			10.42
							15.51			11.16
							13.88			11.19
							12.7			10.68
							12.5			10.75
							14			12.39
							14.29			10.69
							12.24			12.32
							11.81			8.71
							13.62			8.81
							10.38			11.48
							13.68			8.9
							12.43			9.12
							12.36			13.09
							14.81			9.28
							15.89			10.02
							11.65			10.96
							12.51			12.82
							12.48			13.81
							12.95			11.84
							21.02			12.84
							12.89			15.75
							13.39			11.03
							13.39			8.67
							11.05			10.91
							13.22			12.84
							12.22			8.95
							12.43			10.48
							12.39			10.22
							11.8			9.82
							10.96			9.69
							11.58			10.58
							10.63			13.01
							11.68			12.5
							14.07			13.59
							11.62			13.97
							11.12			13.21
										10.73
										13.13
										10.85
										14.35
										11.98
										11.15
										12.38
										10.77
										12.96
										12.06
										12.38
										11.45
										11.01
										10.32
										12.47
										10.23
										12.13
										11.3
										11.13
										11.1
										8.86
										12.6
										12.41
										12.12
										13.08
										9.65
										13.15
										13.15
										11.54
										14.12
										12.77
										10.06
										9.76
										12.43
										11.08
										11.1
										10.66
										14.04
										13.17
										12.25
										11.48
										11.32
										12.84
										12.29
										10.97
										13.57
										12.52
										13.51
